# Supplementary material
Source: publisher figshare collection journal article supplement (https://sage.figshare.com/ndownloader/files/14126414)
Supplement: Supplementary file 1 [file 14126414]

## Sheet: Taul1
Table 1 a.	The percentage of the excellent responders to rTMS (and the number of the patients) at the time from the beginning of the treatment,
	based on the reduction of tinnitus VAS score (intensity, annoyance and distress) ≥30% and the reduction of THI scores at least by 6, compared with the baseline.
	Additionally, the absolute difference (navigated rTMS - non-navigated rTMS) (and 95% CI) in the responder rates (%) between the treatment groups is reported.
Time	Navigated rTMS group, % (no. of patients)	Non-navigated rTMS group, % (no. of patients)	P value for between-group comparison	Absolute difference (95% CI)
After	30 (6)	45 (9)	0.51	-15 (-42.7 to 15.2)
1 month	25 (5)	55 (11)	0.11	-30 (-54.9 to 2.6)
3 month	30 (6)	40 (8)	0.74	-10 (-38.1 to 19.6)
Table 1 b.	The percentage of the responders to rTMS (and the number of the patients) at the time from the beginning of the treatment,
	based on the reduction of tinnitus VAS score (intensity, annoyance and distress) ≥30 %, compared with the baseline.
Time	Navigated rTMS group, % (no. of patients)	Non-navigated rTMS group, % (no. of patients)	P value for between-group comparison
After	45 (9)	55 (11)	0.75
1 month	35 (7)	65 (13)	0.11
3 month	35 (7)	50 (10)	0.52
Table 1 c.	The percentage of the responders to rTMS (and the number of the patients) at the time from the beginning of the treatment,
	based only on the reduction of tinnitus intensity (VAS) ≥30 %, compared with the baseline.
Time	Navigated rTMS group, % (no. of patients)	Non-navigated rTMS group, % (no. of patients)	P value for between-group comparison
After	45 (9)	65 (13)	0.34
1 month	40 (8)	75 (15)	0.054
3 month	35 (7)	55 (11)	0.34
Table 1 d.	The percentage of the responders to rTMS (and the number of the patients) at the time from the beginning of the treatment,
	based only on the reduction of THI scores at least by 6, compared with the baseline.
	Additionally, the absolute difference (navigated rTMS - non-navigated rTMS) (and 95% CI) in the responder rates (%) between the treatment groups is reported.
Time	Navigated rTMS group, % (no. of patients)	Non-navigated rTMS group, % (no. of patients)	P value for between-group comparison	Absolute difference (95% CI)
After	75 (15)	80 (16)	1.00	-5 (-31.3 to 21.8)
1 month	70 (14)	85 (17)	0.45	-15 (-37.3 to 15.1)
3 month	70 (14)	80 (16)	0.72	-10 (-36.5 to 17.6)
6 month	85 (17)	85 (17)	1.00	0 (-24.3 to 24.3)
